# Supplementary material for: Sex Differences in Sphingosine-1-Phosphate Levels Are Dependent on Ceramide Synthase 1 and Ceramidase in Lung Physiology and Tumor Conditions
Source: MDPI journal article supplement (doi:10.3390/ijms241310841), 2023-06-29
Supplement: s1 [file s1]

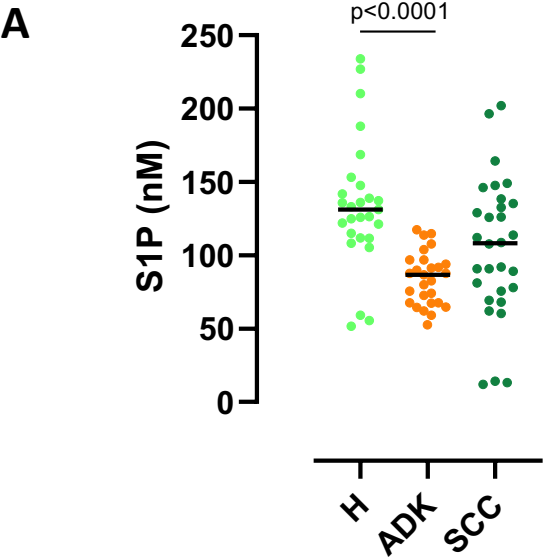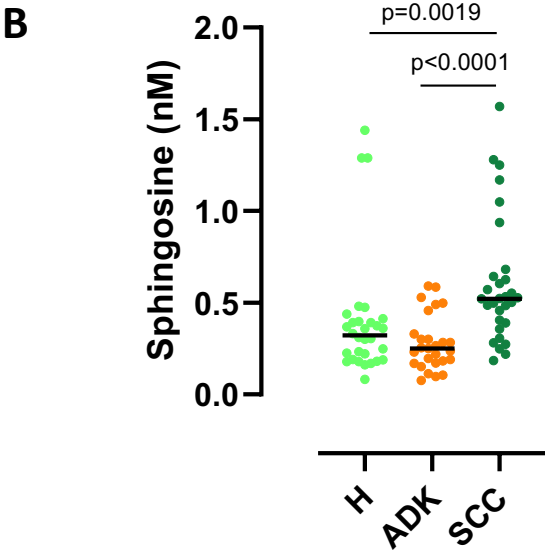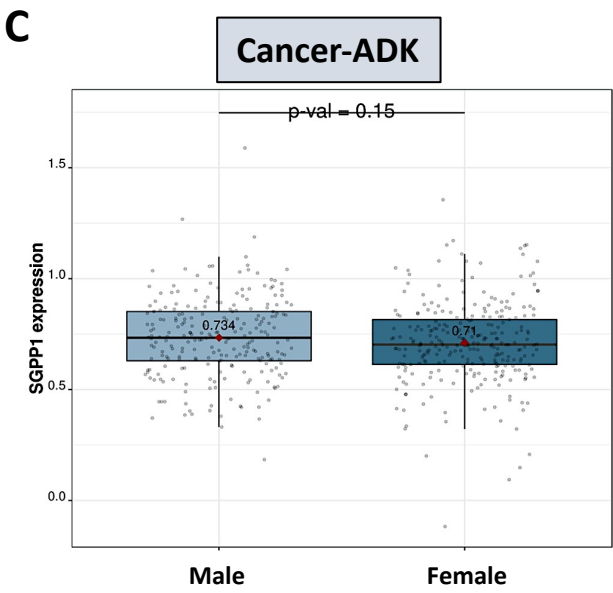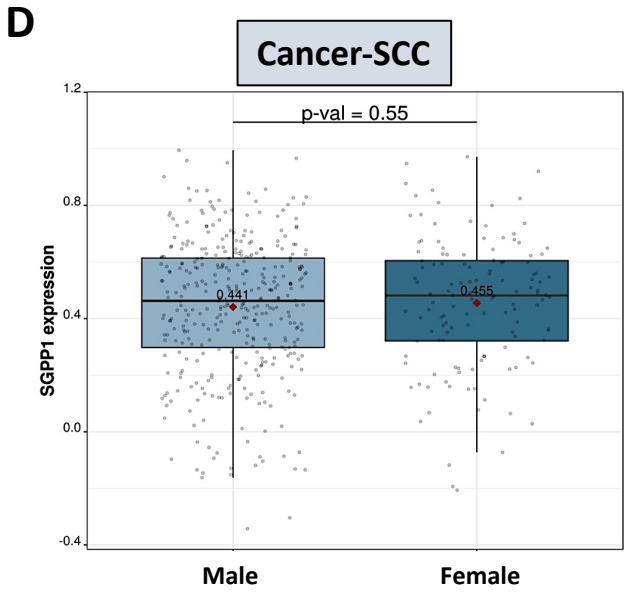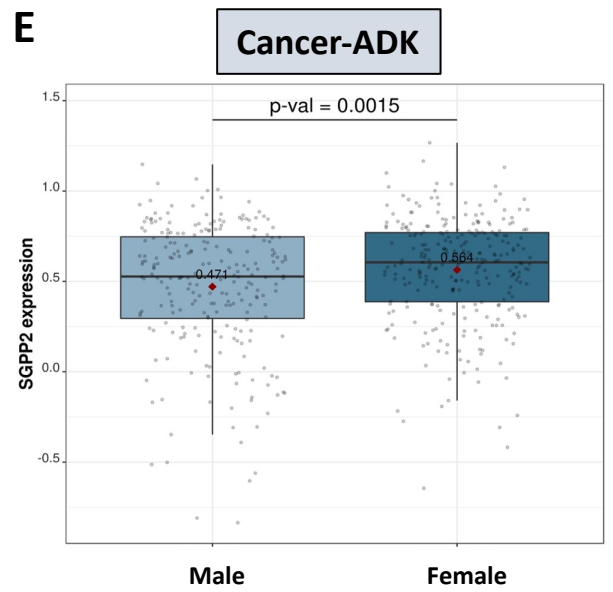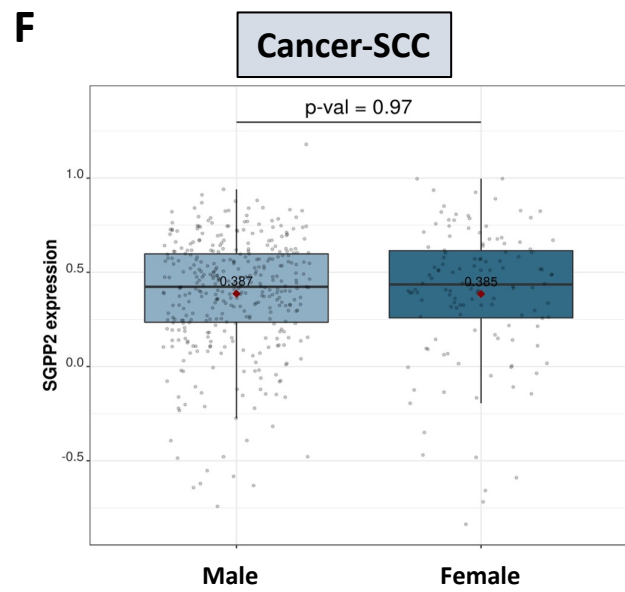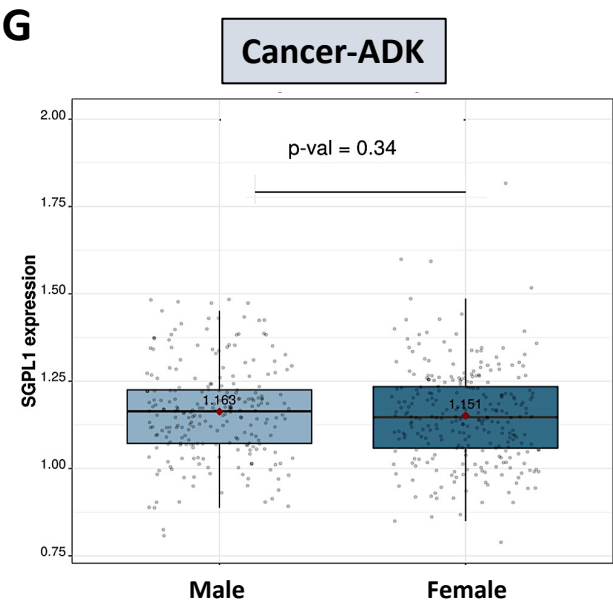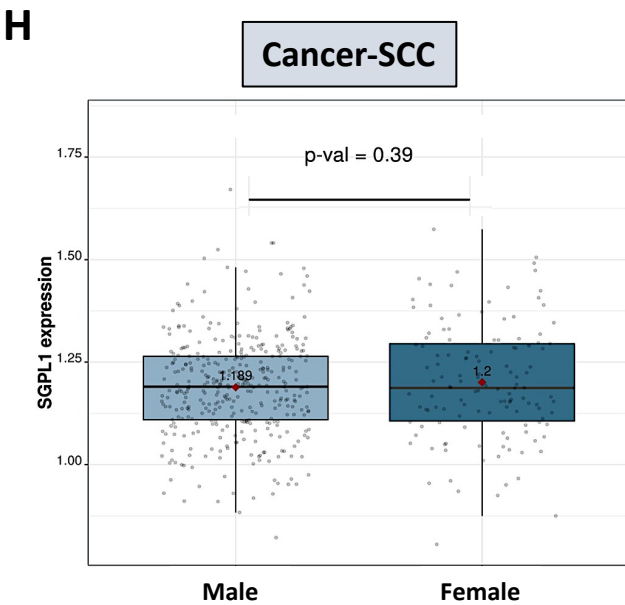

Supplementary Figure S1

**Supplementary Figure S1.** S1P (A) and sphingosine (B) quantification in plasma of H (n=27), ADK (n=37) and SCC patients (n=30), by means of LC-MS/MS. Statistical differences were assessed by means of One-way ANOVA followed by Dunn's post hoc test. H: healthy; ADK: lung adenocarcinoma; SCC: lung squamous cell carcinoma. Transcripts quantification of sphingosine-1-phosphate phosphatase 1 and 2 (SGPP1 and SGPP2) in cancerous lung tissues of ADK (C and E, male=240; female n=277) and SCC (D and F, male=371; female n=130) patients. Transcripts quantification of sphingosine-1-phosphate lyase 1 (SGPL1) in cancerous lung tissues of ADK (G, male=240; female n=277) and SCC (H, male=371; female n=130) patients. Data were from RNAseq TCGA\_LUAD\_2016, for lung adenocarcinoma patients, and TCGA\_LUSC\_2016 dataset, for lung squamous cell carcinoma patients. A comparative analysis of transcripts with default parameters was performed by means of Lung Cancer Explorer (LCE) tool .

A

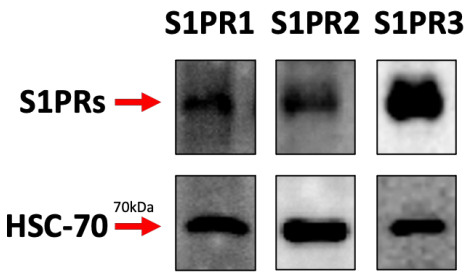

B

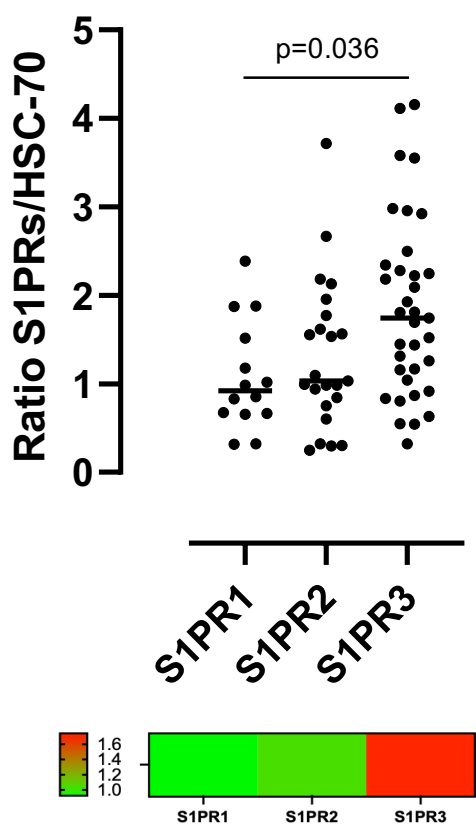

C

ADK

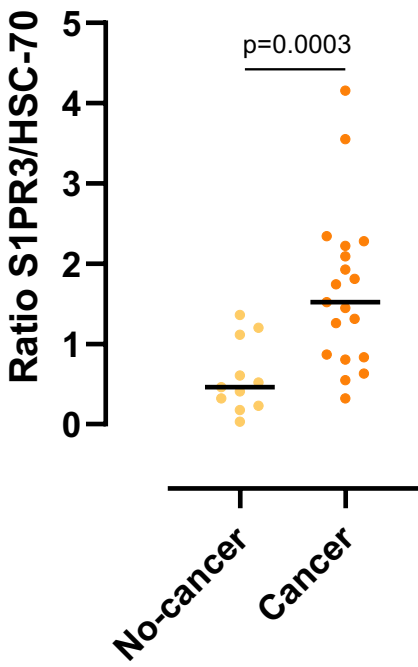

D

SCC

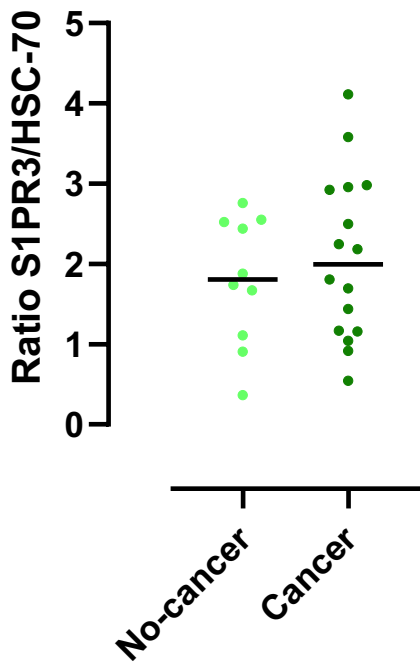

E

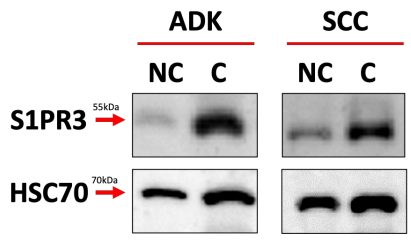

**Supplementary Figure S2. Expression of S1PRs on lung cancerous tissues.** S1PR3 (55kDa; n=35) was over-expressed in lung cancerous tissues, compared to S1PR1 (44kDa; n=14) and S1PR2 (40-50kDa; n=23). HSC70 was used as loading control (**A** and **B**) . Data are represented as scatter dot plots indicating the median. Statistical differences were assessed by means of One-way ANOVA followed by Dunn's post hoc test. Western blotting analysis showed a higher expression of S1PR3 (55kDa) in cancerous lung tissues of ADK patients (Cancer, n=19) compared to non-cancerous lung tissues (No-cancer, n=11) (**C**), while cancerous (Cancer, n=16) and non-cancerous (No-cancer, n=10) lung tissues of SCC patients had similar expression of S1PR3 (**D**). **E**) Representative blot for S1PR3 expression in non-cancerous (NC) and cancerous (C) tissues of ADK and SCC patients. The quantitative analysis was performed by ImageJ software. Data are represented as scatter dot plots indicating the median. Statistical differences were assessed by means of two-tailed Mann-Whitney U test. S1PR1: sphingosine-1-phosphate receptor 1; S1PR2: sphingosine-1-phosphate receptor 2; S1PR3: sphingosine-1-phosphate receptor 3; HSC70: Heat shock cognate protein 70; ADK: lung adenocarcinoma; SCC: lung squamous cell carcinoma.



**A** No-cancer

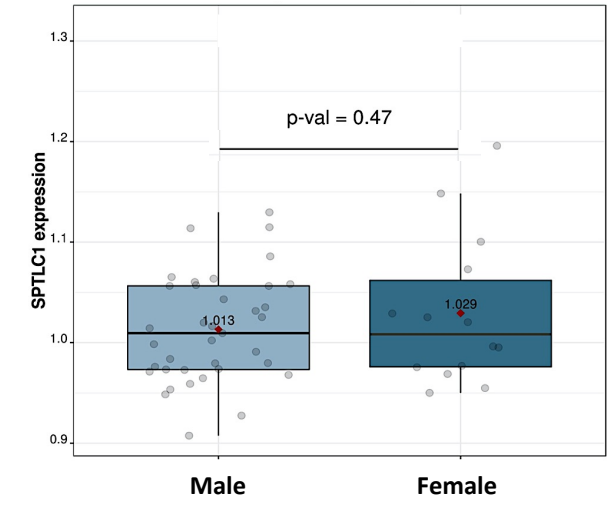

**B** Cancer

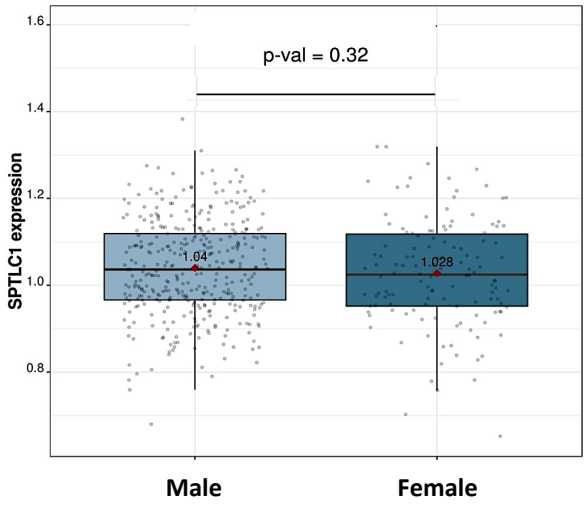

**C** No-cancer

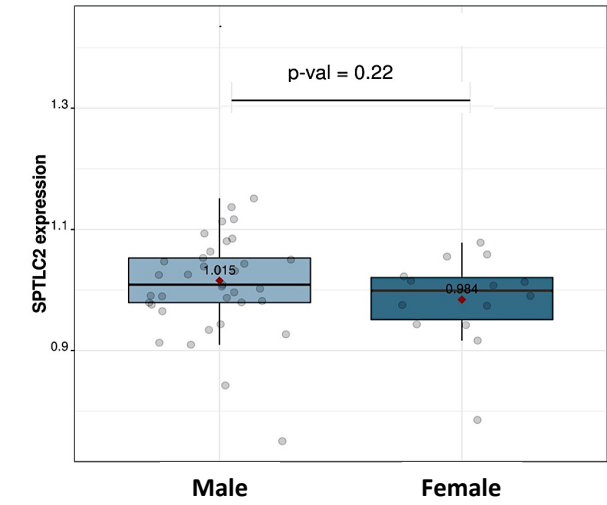

**D** Cancer

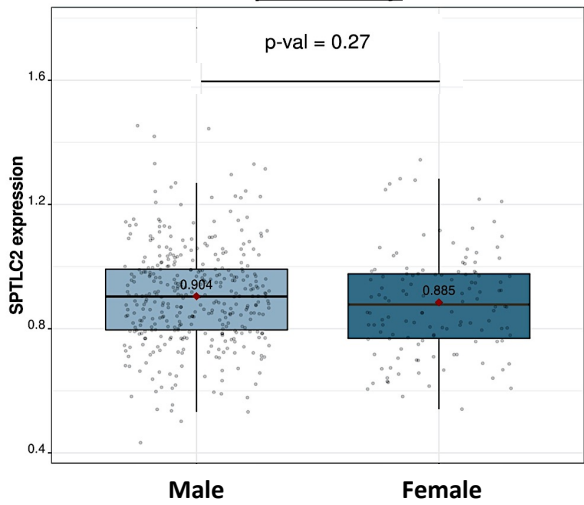

**E** No-cancer

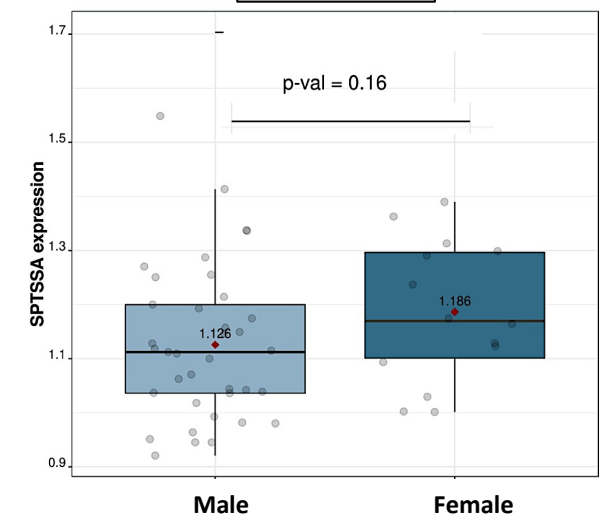

**F** Cancer

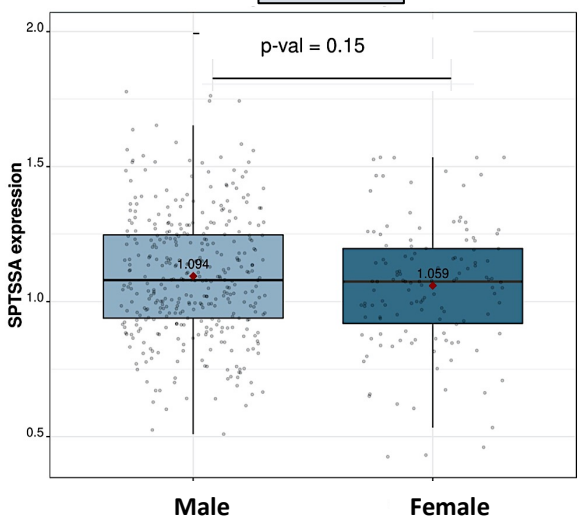

**G** No-cancer

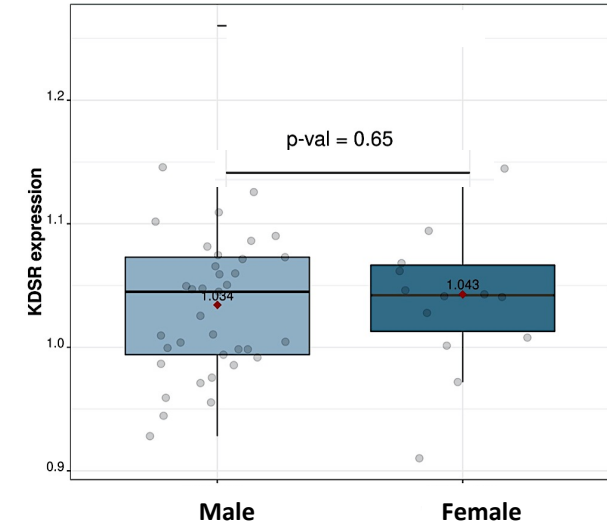

**H** Cancer

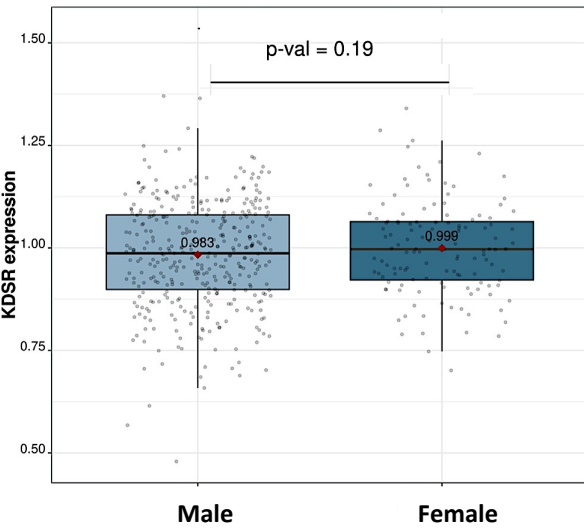

Supplementary Figure S3

**Supplementary Figure S3. Expression of S1P metabolic enzymes involved in the first two steps of *de novo* synthesis.** Transcripts expression of the S1P *de novo* synthesis enzymes in non-cancerous (No-cancer, male n=37, female n=14) and cancerous (Cancer, male n=371, female n=130) lung tissues of SCC patients from TCGA\_LUSC\_2016 dataset. Serine palmitoyl transferase (SPT) subunits: Serine palmitoyl transferase long chain base subunit 1 and 2 (SPTLC1 and 2) and serine palmitoyl transferase small subunit A (SPTSSA) (**A-F**); 3-ketodihydrosphingosine reductase (KDSR) (**G-H**). A comparative analysis of transcripts with default parameters was performed by means of Lung Cancer Explorer (LCE) tool.

A

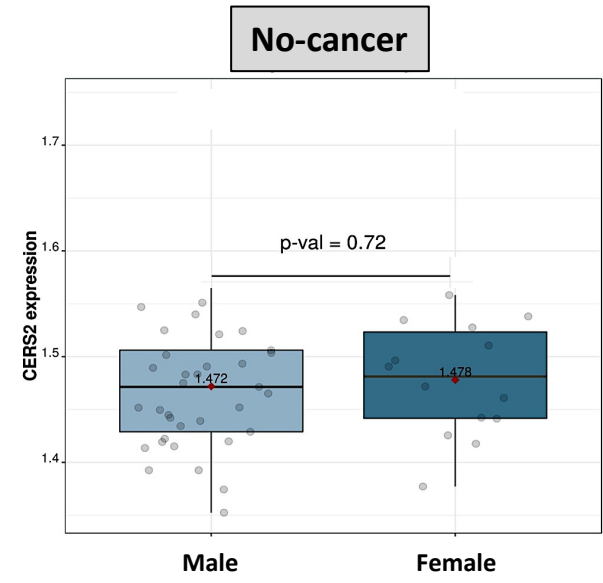

B

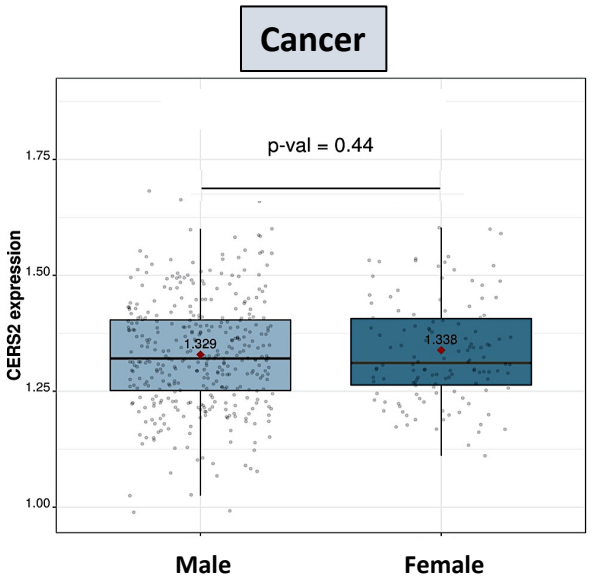

C

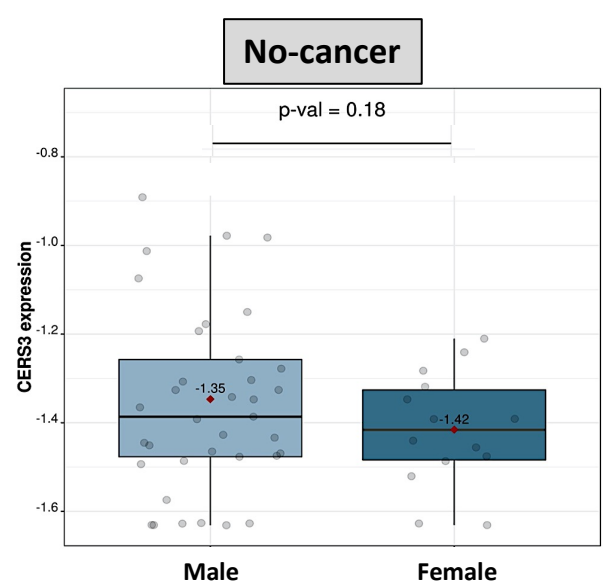

D

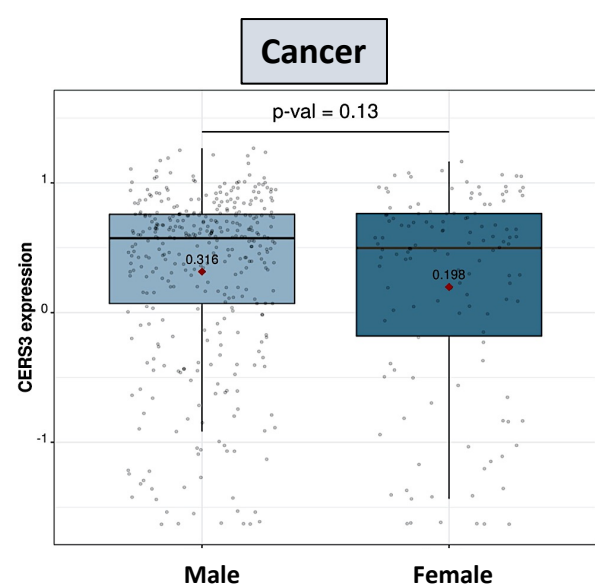

E

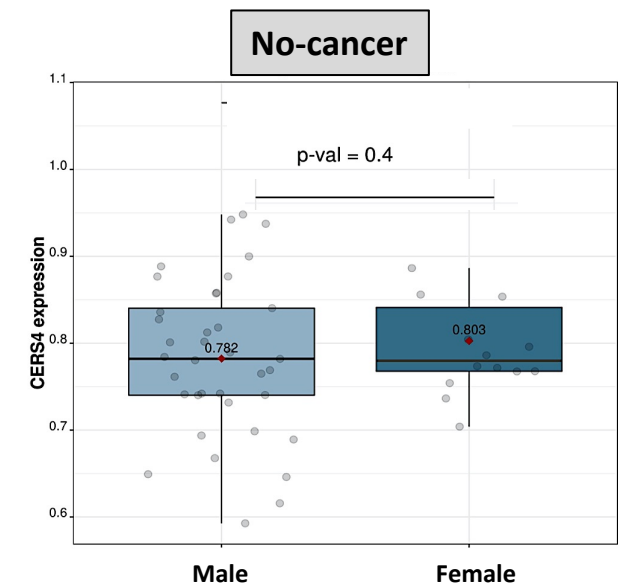

F

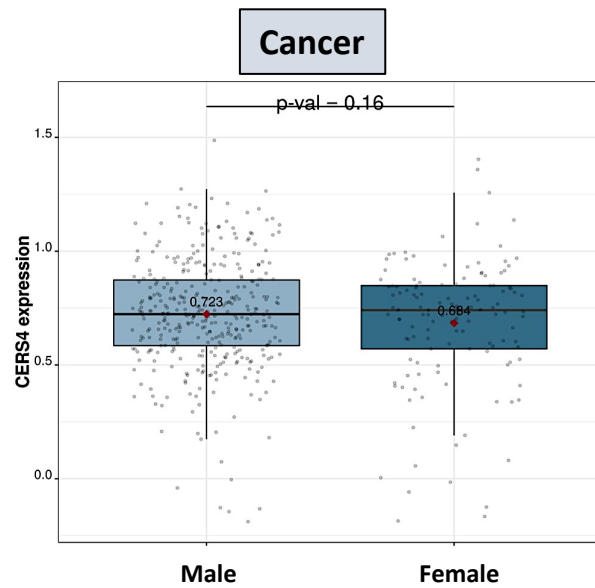

Supplementary Figure S4

**Supplementary Figure S4. Expression of S1P metabolic enzymes producing dihydroceramide starting from dihydrosphinganine.**

Transcripts expression of the S1P *de novo* synthesis enzymes in non-cancerous (No-cancer, **A**, **C** and **E**, male n=37, female n=14) and cancerous (Cancer, **B**, **D** and **F**, male n=371, female n=130) lung tissues of SCC patients from TCGA\_LUSC\_2016 dataset: ceramide synthase 2 (CERS2, **A** and **B**), 3 (CERS3, **C** and **D**) and 4 (CERS4, **E** and **F**). A comparative analysis of transcripts with default parameters was performed by means of Lung Cancer Explorer (LCE) tool.

A

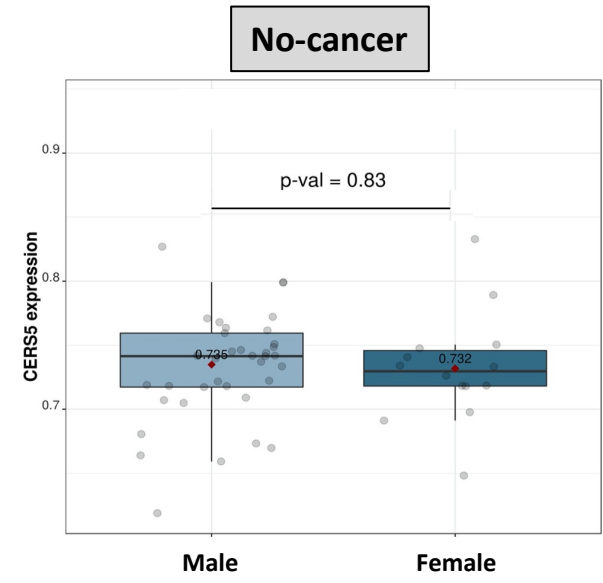

B

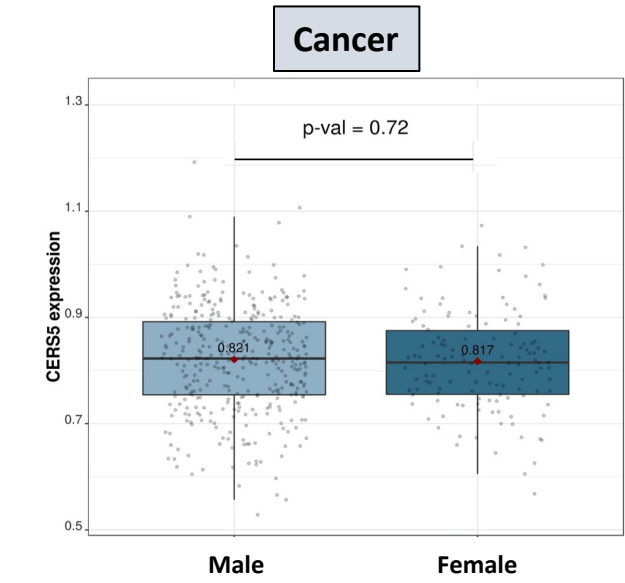

C

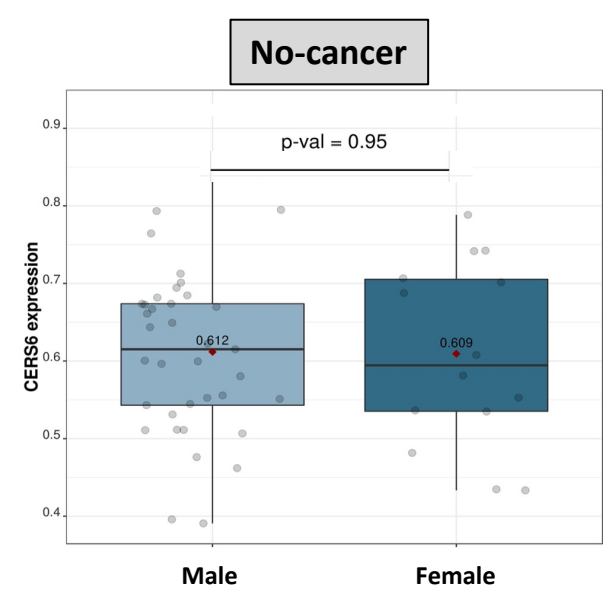

D

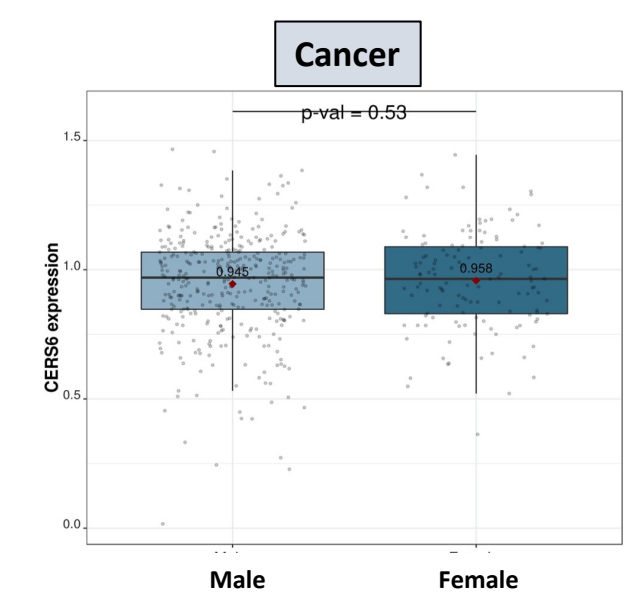

**Supplementary Figure S5. Expression of S1P metabolic enzymes producing dihydroceramide starting from dihydrosphinganine.** Transcripts expression of the S1P *de novo* synthesis enzymes in non-cancerous (No-cancer, **A** and **C**, male n=37, female n=14) and cancerous (Cancer, **B** and **D**, male n=371, female n=130) lung tissues of SCC patients from TCGA\_LUSC\_2016 dataset: ceramide synthase 5 (CERS5, **A** and **B**) and 6 (CERS6, **C** and **D**). A comparative analysis of transcripts with default parameters was performed by means of Lung Cancer Explorer (LCE) tool.

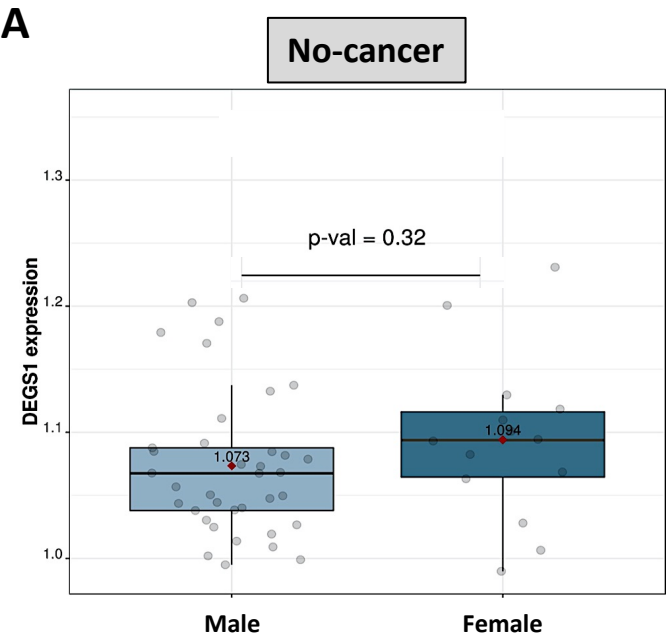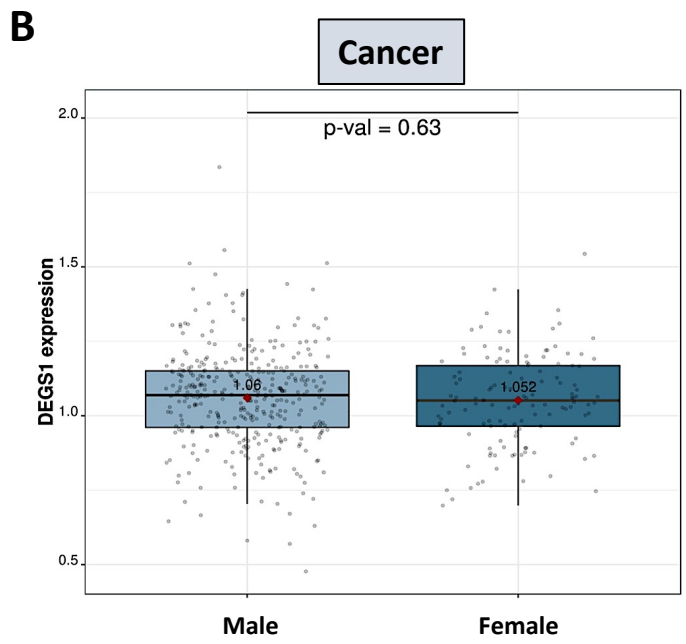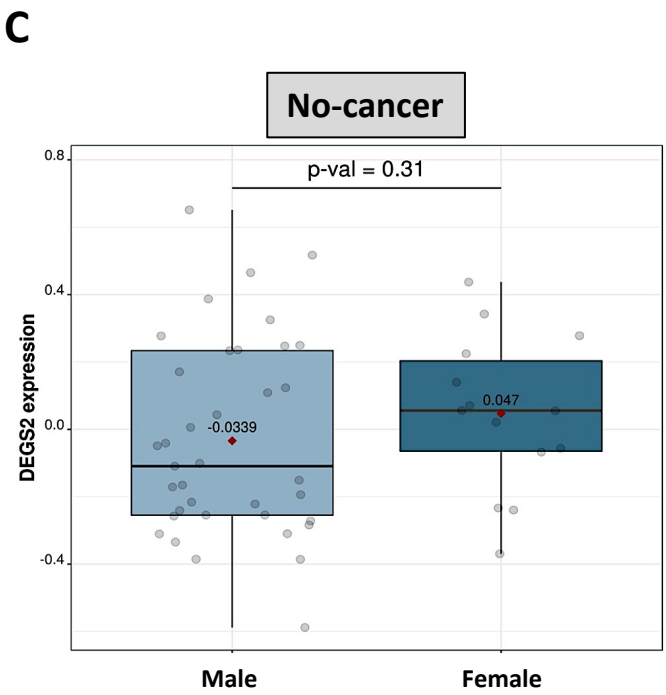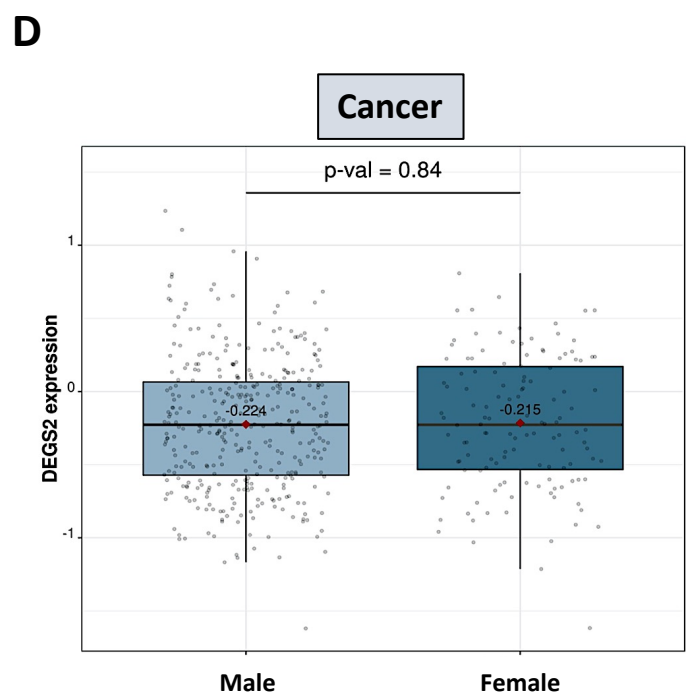

**Supplementary Figure S6. Expression of S1P metabolic enzymes producing ceramide starting from dihydroceramide.** Transcripts expression of the S1P *de novo* synthesis enzymes in non-cancerous (No-cancer, male n=37, female n=14) and cancerous (Cancer, male n=371, female n=130) lung tissues of SCC patients from TCGA\_LUSC\_2016 dataset. Dihydroceramide desaturase 1 (DEGS1, **A** and **B**) and 2 (DEGS2, **C** and **D**). A comparative analysis of transcripts with default parameters was performed by means of Lung Cancer Explorer (LCE) tool.

**A** **No-cancer**

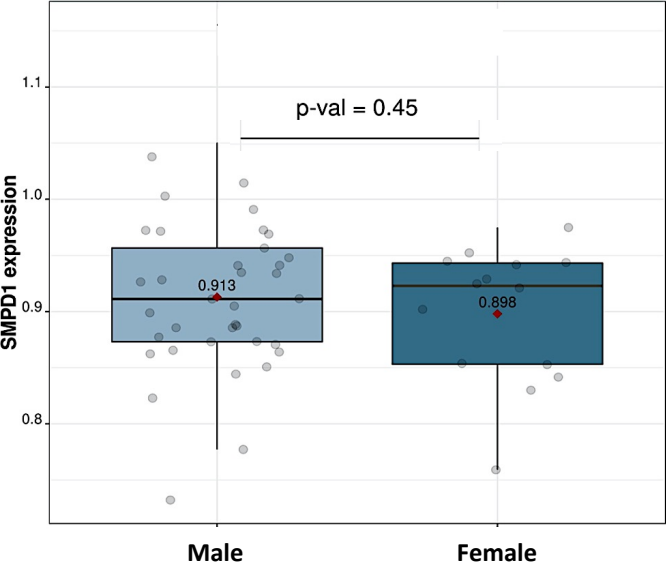

**B** **Cancer**

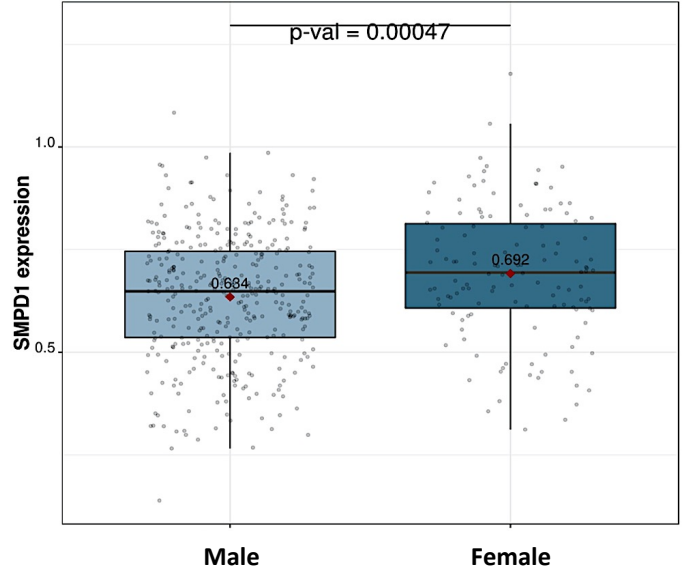

**C** **No-cancer**

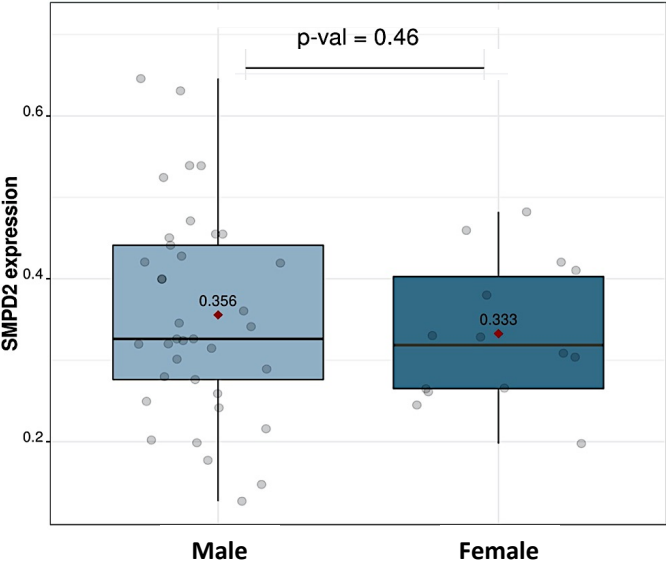

**D** **Cancer**

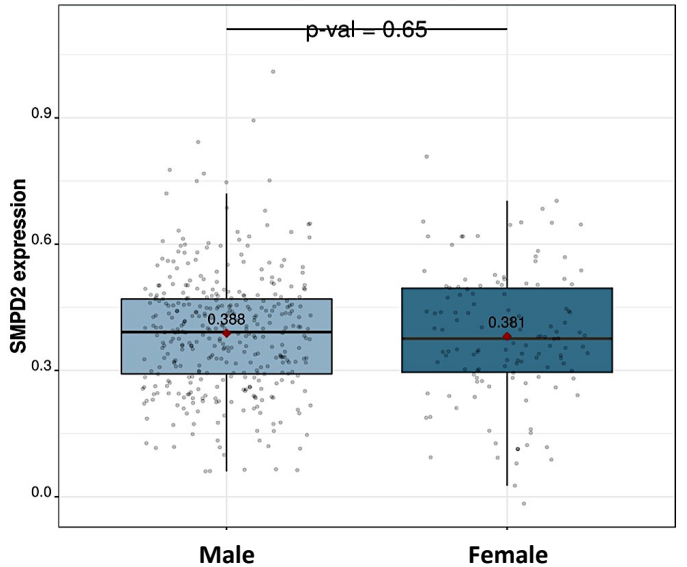

**E** **No-cancer**

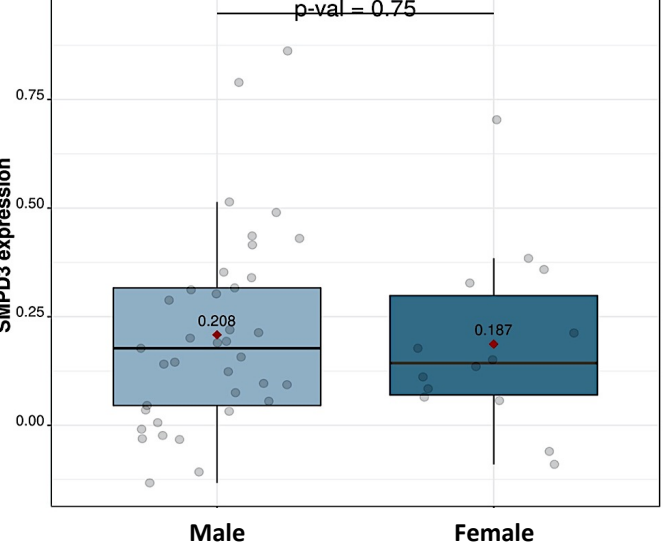

**F** **Cancer**

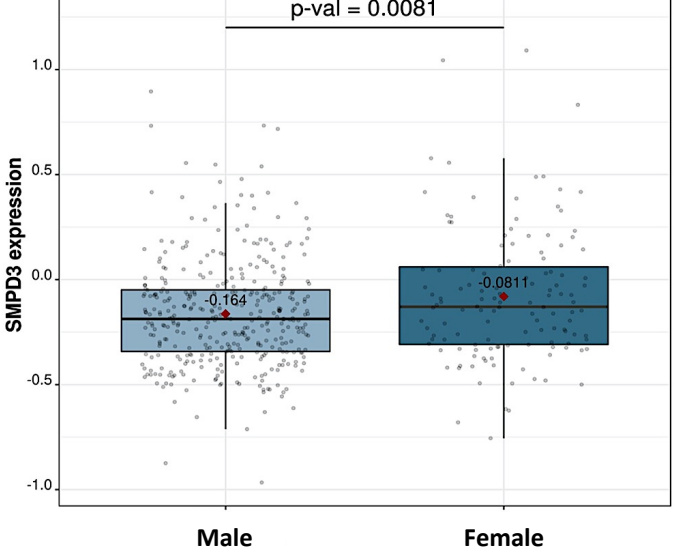

**Supplementary Figure S7. Expression of S1P metabolic enzymes involved in the sphingomyelin hydrolysis.** Transcripts expression of the sphingomyelin-dependent S1P synthesis enzymes in non-cancerous (No-cancer, male n=37, female n=14) and cancerous (Cancer, male n=371, female n=130) lung tissues of SCC patients from TCGA\_LUSC\_2016 dataset. Sphingomyelinase 1 (SMPD1, **A** and **B**), 2 (SMPD2, **C** and **D**), and 3 (SMPD3, **E** and **F**). A comparative analysis of transcripts with default parameters was performed by means of Lung Cancer Explorer (LCE) tool.



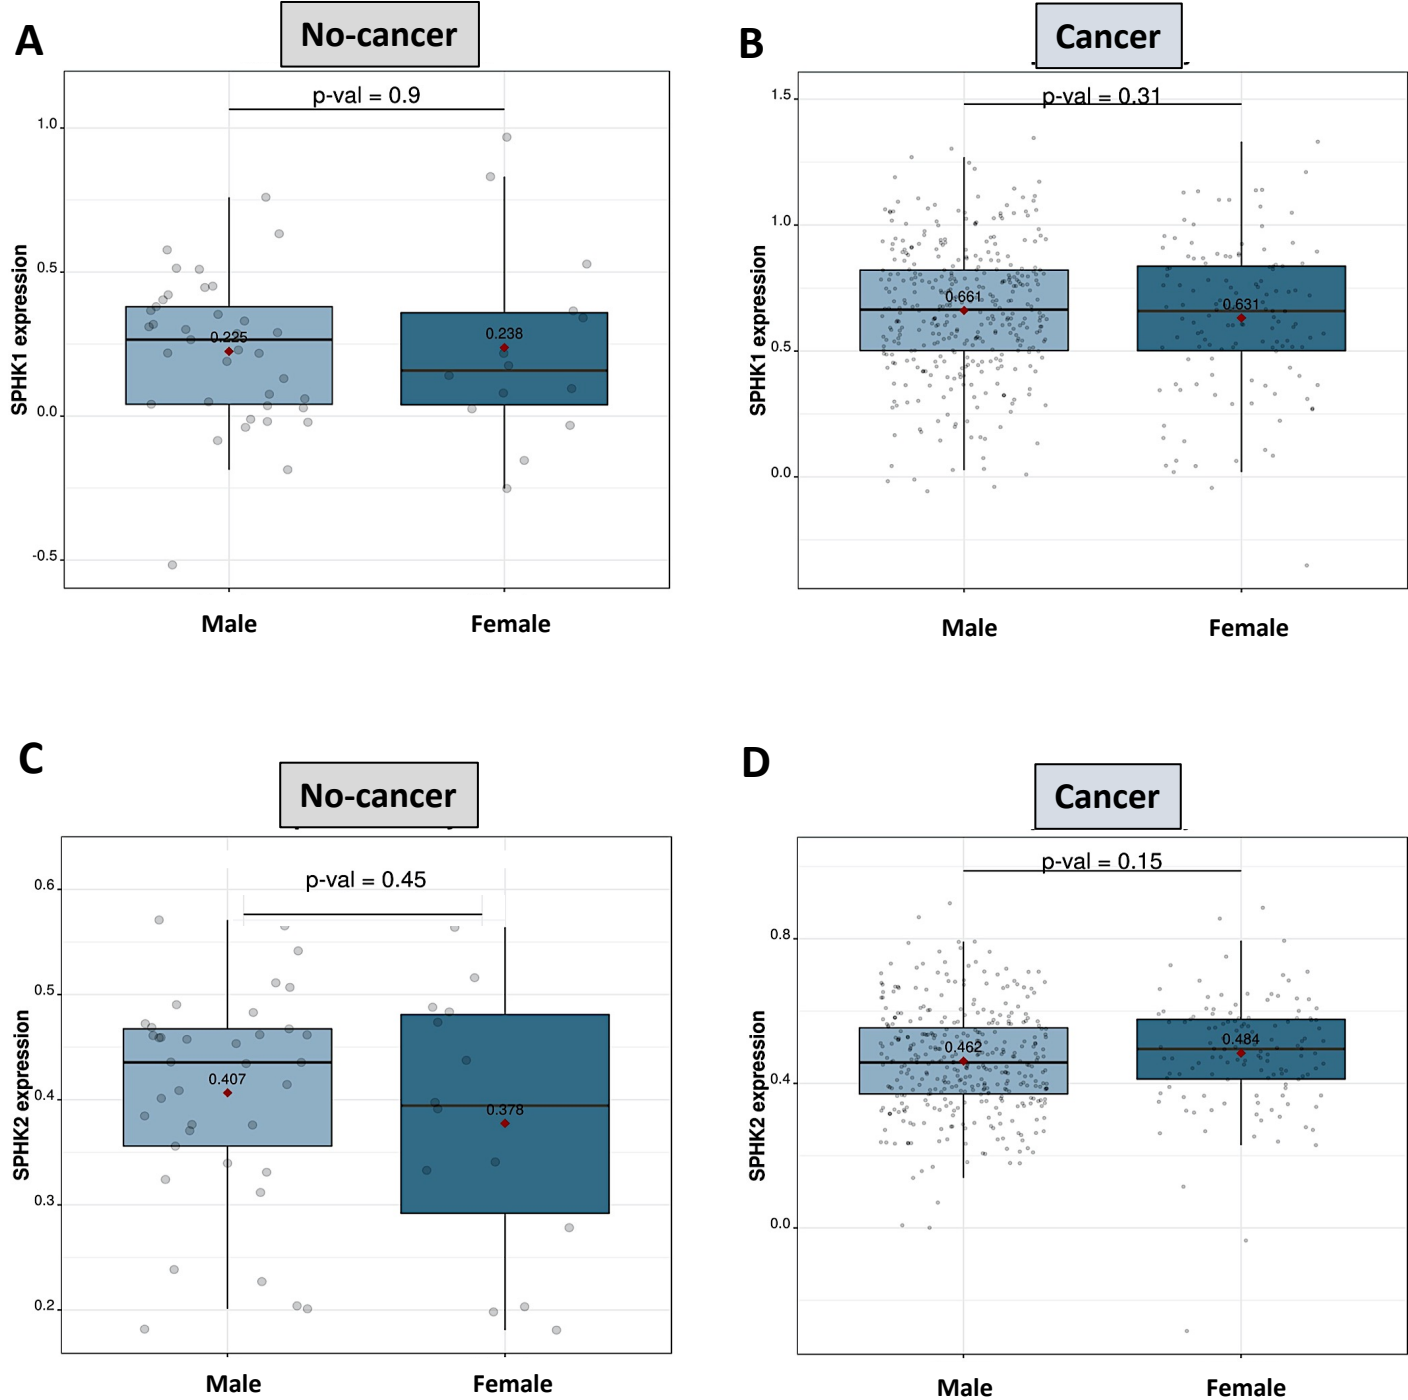

**Supplementary Figure S8. Expression of S1P metabolic enzymes.** Transcripts expression of the sphingosine kinase 1 (SPHK1) (**A** and **B**), sphingosine kinase 2 (SPHK2) (**C** and **D**) in non-cancerous (No-cancer, male n=37, female n=14) and cancerous (Cancer, male n=371, female n=130) lung tissues of male and female SCC patients from TCGA\_LUSC\_2016 dataset. A comparative analysis of transcripts with default parameters was performed by means of Lung Cancer Explorer (LCE) tool.

Supplementary Table S1. Healthy subjects informations. H: healthy.

| Healthy Subjects | Sex    | Age (years) |
|------------------|--------|-------------|
| H1               | Female | 68          |
| H2               | Female | 75          |
| H3               | Female | 69          |
| H4               | Female | 76          |
| H5               | Female | 42          |
| H6               | Female | 60          |
| H7               | Female | 67          |
| H8               | Female | 82          |
| H9               | Female | 73          |
| H10              | Female | 77          |
| H11              | Female | 41          |
| H12              | Female | 35          |
| H13              | Male   | 53          |
| H14              | Male   | 59          |
| H15              | Male   | 66          |
| H16              | Male   | 67          |
| H17              | Male   | 55          |
| H18              | Male   | 33          |
| H19              | Male   | 49          |
| H20              | Male   | 78          |
| H21              | Male   | 63          |
| H22              | Male   | 61          |
| H23              | Male   | 59          |
| H24              | Male   | 59          |
| H25              | Male   | 46          |
| H26              | Male   | 49          |
| H27              | Male   | 53          |

**Supplementary Table S2. Non-small cell lung cancer (NSCLC) patients informations.** LC: lung cancer; ADK: lung adenocarcinoma; SCC: lung squamous cell carcinoma.

| NSCLC patients | Sex    | Histotype | Age (years) |
|----------------|--------|-----------|-------------|
| LC1            | Female | ADK       | 72          |
| LC2            | Female | ADK       | 67          |
| LC3            | Female | ADK       | 73          |
| LC4            | Female | ADK       | 59          |
| LC5            | Female | ADK       | 68          |
| LC6            | Female | ADK       | 57          |
| LC7            | Female | ADK       | 54          |
| LC8            | Female | ADK       | 63          |
| LC9            | Female | ADK       | 44          |
| LC10           | Female | ADK       | 62          |
| LC11           | Female | ADK       | 62          |
| LC12           | Female | ADK       | 75          |
| LC13           | Male   | ADK       | 66          |
| LC14           | Male   | ADK       | 71          |
| LC15           | Male   | ADK       | 42          |
| LC16           | Male   | ADK       | 80          |
| LC17           | Male   | ADK       | 83          |
| LC18           | Male   | ADK       | 69          |
| LC19           | Male   | ADK       | 66          |
| LC20           | Male   | ADK       | 79          |
| LC21           | Male   | ADK       | 66          |
| LC22           | Male   | ADK       | 75          |
| LC23           | Male   | ADK       | 56          |
| LC24           | Male   | ADK       | 41          |
| LC25           | Male   | ADK       | 49          |
| LC26           | Male   | ADK       | 59          |
| LC27           | Male   | ADK       | 58          |
| LC28           | Female | SCC       | 67          |
| LC29           | Female | SCC       | 63          |
| LC30           | Female | SCC       | 68          |
| LC31           | Female | SCC       | 40          |
| LC32           | Female | SCC       | 55          |
| LC33           | Female | SCC       | 77          |
| LC34           | Female | SCC       | 35          |
| LC35           | Female | SCC       | 49          |
| LC36           | Female | SCC       | 69          |
| LC37           | Female | SCC       | 35          |
| LC38           | Female | SCC       | 59          |
| LC38           | Female | SCC       | 82          |
| LC40           | Female | SCC       | 27          |
| LC41           | Female | SCC       | 70          |
| LC42           | Female | SCC       | 48          |
| LC43           | Male   | SCC       | 45          |
| LC44           | Male   | SCC       | 54          |
| LC45           | Male   | SCC       | 57          |
| LC46           | Male   | SCC       | 52          |
| LC47           | Male   | SCC       | 69          |
| LC48           | Male   | SCC       | 42          |
| LC49           | Male   | SCC       | 53          |
| LC50           | Male   | SCC       | 49          |
| LC51           | Male   | SCC       | 40          |
| LC52           | Male   | SCC       | 50          |
| LC53           | Male   | SCC       | 43          |
| LC54           | Male   | SCC       | 50          |
| LC55           | Male   | SCC       | 55          |
| LC56           | Male   | SCC       | 35          |
| LC57           | Male   | SCC       | 72          |
